# Supplementary material for: ERK activation via A1542/3 limonoids attenuates erythroleukemia through transcriptional stimulation of cholesterol biosynthesis genes
Source: PubMed Central journal article supplement (PMC8191108; doi:10.1186/s12885-021-08402-6), 2021-06-09
Supplement: 12885_2021_8402_MOESM1_ESM.pdf [file 12885_2021_8402_MOESM1_ESM.pdf]

**Additional Table 1: qPCR primer sequences.**

| S. No | Gene    | Sense                   | Antisense               |
|-------|---------|-------------------------|-------------------------|
| 1     | HMGCS1  | GATGTGGGAATTGTTGCCCTT   | ATTGTCTCTGTTCCAACCTCCAG |
| 2     | FDPS    | TGTGACCGGCAAATTGGC      | GCCCGTTGCAGACACTGAA     |
| 3     | LSS     | GCACTGGACGGGTGATTATGG   | TCTCTTCTCTGTATCCGGCTG   |
| 4     | EBP     | CTCAGCACCTAAGACTGGACA   | ACGACTAAGACCCCTGTGACA   |
| 5     | MSMO1   | TGCTTTGGTTGTGCAGTCATT   | GGATGTGCATATTCAGCTTCCA  |
| 6     | CYP51A1 | GAAACGCAGACAGTCTCAAGA   | ACGCCATCCTTGTATGTAGC    |
| 7     | FDFT1   | CCACCCCGAAGAGTTCTACAA   | TGCGACTGGTCTGATTGAGATA  |
| 8     | IDI1    | TCCATTAAGCAATCCAGCCGA   | CCCAGATACCATCAGACTGAGC  |
| 9     | DHCR24  | GCCGCTCTCGCTTATCTTCG    | GTCTTGCTACCCTGCTCCTT    |
| 10    | MVK     | GGAGCAAGGTGATGTCACAAC   | CGGCAGATGGACAGGTATAAGT  |
| 11    | SQLE    | GGCATTGCCACTTTCACCTAT   | GGCCTGAGAGAATATCCGAGAAG |
| 12    | HSD17B7 | TGGGATCATGCCTAATCCACA   | CCAGTTCCCGAATCAGGATAAAA |
| 13    | SC5D    | ACCATACGTGTATCCAGCCAC   | GCTCAGTGTTGCACAGAAGAAA  |
| 14    | DHCR7   | GCTGCAAATCGCAACCCAA     | GCTCGCCAGTGAAAACCAGT    |
| 15    | NSDHL   | ACGCCATCCTTGTATGTAGC    | ACTGTGCATCTCTTGGCCTG    |
| 16    | MVD     | GGACCGGATTTGGCTGAATG    | CCCATCCCGTGAGTTCCTC     |
| 17    | HMGCR   | TGATTGACCTTTCAGAGCAAG   | CTAAAATTGCCATTCCACGAGC  |
| 18    | TM7SF2  | GTCGCCTGCGCTATCCTATTA   | TGCGCCTTCATGTAGAGAAAGA  |
| 19    | SREBP1  | ACAGTGACTTCCCTGGCCTAT   | GCATGGACGGGTACATCTTCAA  |
| 20    | SREBP2  | CCTGGGAGACATCGACGAGAT   | TGAATGACCGTTGCACTGAAG   |
| 21    | EGR1    | GTCCCAGCTCATCAAACCCA    | TTCAGCTCCTGGCAAACCT     |
| 22    | IER2    | ACTGGTCCCGAGCAAGAAAG    | CGACTTCGGATGACGCTCC     |
| 23    | LDLR    | TCTGCAACATGGCTAGAGACT   | TCCAAGCTAAGCTTGGTCCC    |
| 24    | CDC20   | GCACAGTTCGCGTTTCGAGA    | CTGGATTTGCCAGGAGTTCGG   |
| 25    | PPP2R2A | CATACCAGGTGCATGAATACCTC | GGGTTATGTCTCGCTTTGTGTTT |
| 26    | FOS     | CCGGGGATAGCCTCTCTTACT   | CCAGGTCCGTGCAGAAGTC     |
| 27    | FOSB    | GCTGCAAGATCCCCTACGAAG   | ACGAAGAAGTGTACGAAGGGTT  |
| 28    | BTG2    | ACGGGAAGGGAACCGACAT     | CAGTGGTGTTTGTAGTGCTCTG  |
| 29    | BTGS2   | CGCACTTATACTGGTCAAATCCC | CTGGCGCTCAGCCATACAG     |
| 30    | JUN     | TCCAAGTGCCGAAAAGGAAG    | CGAGTTCTGAGCTTTC AAGGT  |
| 31    | TNF     | CCTCTCTCTAATCAGCCCTCTG  | GAGGACCTGGGAGTAGATGAG   |

**Additional Table 2: ShRNA and siRNA sequences.**

## SREBP1 shRNA

|            |                                                                 |
|------------|-----------------------------------------------------------------|
| SREBP1-sh1 | 5'-GACTTCCTCACCTCTTCTATTTCAAGAGAATAGAAGAGGGTGAGGAAGTCTTTTTT-3'  |
| SREBP1-sh2 | 5'-CCTCAACCCAGCAGCAATTTGTTCAAGAGACAAATTGCTGCTGGGTTGAGGTTTTTT-3' |
| SREBP1-sh3 | 5'-GCTGGCCTTCTCTCGTCTGATTTCAAGAGAATCAGACGAGAGAAGGCCAGCTTTTTT-3' |

**Additional Table 3:** Major clusters with biological functions regulated by A1542 compounds

C1 - cholesterol biosynthesis

C2 - Immune responses including response to cytokine

C3 - Positive regulation of macromolecule metabolic process

C4 - Cell Cycle

C5 - Regulation of cell growth and/or organization + cholesterol homeostasis

**Additional Table 4.** RNAseq data for expression of 67 genes regulated by A1542 in HEL cells treated for 24 h with A1542 (1µM).

| Other<br>Gene ID | HEL_DMSO<br>FPKM | HEL_A1542<br>FPKM | Fold change<br>(C/B) |          |        |        |       |
|------------------|------------------|-------------------|----------------------|----------|--------|--------|-------|
| EGR1             | 6.82             | 149.33            | 21.896               | LSS      | 55.04  | 143.58 | 2.609 |
| CDKN1A           | 6.29             | 54.39             | 8.647                | NFKBIA   | 10.89  | 28.32  | 2.601 |
| CD69             | 9.24             | 70.29             | 7.607                | PPP1R16B | 7.86   | 20.11  | 2.559 |
| CXCL2            | 3.2              | 23.75             | 7.422                | IER2     | 61.57  | 156.31 | 2.539 |
| TNF              | 21.93            | 150.36            | 6.856                | IDI1     | 48.39  | 121.56 | 2.512 |
| BHLHE40          | 6.17             | 38.61             | 6.258                | CLCN6    | 8.86   | 21.99  | 2.482 |
| HMGCS1           | 40.4             | 238.84            | 5.912                | PMP22    | 9.19   | 22.35  | 2.432 |
| CXCL3            | 3.53             | 20.82             | 5.898                | VEGFA    | 19.3   | 46.12  | 2.390 |
| RGS16            | 4.24             | 24.66             | 5.816                | P4HA1    | 9.22   | 21.98  | 2.384 |
| BCL3             | 4.49             | 21.02             | 4.682                | HSD17B7  | 10.3   | 23.98  | 2.328 |
| BTG2             | 23.56            | 104.97            | 4.455                | FDFT1    | 90.55  | 210.36 | 2.323 |
| GDF15            | 47.56            | 208.45            | 4.383                | CXCR4    | 11.03  | 25.55  | 2.316 |
| MAFF             | 5.84             | 23.09             | 3.954                | ZFP36    | 9.82   | 22.69  | 2.311 |
| INSIG1           | 25.21            | 97.24             | 3.857                | FUT1     | 16.33  | 36.88  | 2.258 |
| MSMO1            | 16.82            | 58.29             | 3.466                | ACSS2    | 19.11  | 42.61  | 2.230 |
| BNIP3            | 12.98            | 44.77             | 3.449                | NSDHL    | 17.97  | 39.94  | 2.223 |
| CD300A           | 8.18             | 27.94             | 3.416                | ALAS1    | 27.23  | 59.93  | 2.201 |
| ALDOC            | 38.57            | 124.11            | 3.218                | ZFP36L1  | 12.08  | 26.55  | 2.198 |
| TUBA1A           | 38.6             | 122.89            | 3.184                | MVK      | 12.58  | 27.63  | 2.196 |
| HMGCR            | 23.04            | 72.46             | 3.145                | PTP4A3   | 16     | 34.47  | 2.154 |
| JUNB             | 21.07            | 63.61             | 3.019                | TMEM97   | 33.61  | 72.27  | 2.150 |
| MVD              | 26               | 77.74             | 2.990                | CD274    | 15.05  | 32.36  | 2.150 |
| CYP51A1          | 9.03             | 26.92             | 2.981                | TSC22D3  | 20.78  | 44.25  | 2.129 |
| NFKB2            | 11.03            | 32.84             | 2.977                | PLA2G6   | 10.09  | 21.36  | 2.117 |
| DUSP6            | 29.61            | 85.48             | 2.887                | CFAP161  | 22.74  | 47.84  | 2.104 |
| SLC45A3          | 9.07             | 25.49             | 2.810                | FDPS     | 126.58 | 266.17 | 2.103 |
| IL1B             | 17.83            | 50.01             | 2.805                | LDLR     | 22.21  | 45.83  | 2.063 |
| HES1             | 18.48            | 51.19             | 2.770                | TM7SF2   | 17.53  | 35.82  | 2.043 |
| ACAT2            | 71.1             | 190.53            | 2.680                | CCNB1    | 76.54  | 38.26  | 0.500 |
| SLC2A3           | 56.98            | 151.48            | 2.658                | HBQ1     | 20.48  | 9.41   | 0.459 |
| DHCR7            | 57.14            | 150.73            | 2.638                | CDC20    | 207.89 | 88.26  | 0.425 |
| STARD4           | 12.41            | 32.73             | 2.637                | PSRC1    | 21.39  | 8.92   | 0.417 |
| WNT11            | 20.99            | 54.95             | 2.618                | KIF20A   | 38.99  | 15.98  | 0.410 |
|                  |                  |                   |                      | PLK1     | 109.8  | 42.53  | 0.387 |
