# Supplementary material for: ERK activation via A1542/3 limonoids attenuates erythroleukemia through transcriptional stimulation of cholesterol biosynthesis genes
Source: PubMed Central journal article supplement (PMC8191108; doi:10.1186/s12885-021-08402-6), 2021-06-09
Supplement: 12885_2021_8402_MOESM2_ESM.pdf [file 12885_2021_8402_MOESM2_ESM.pdf]

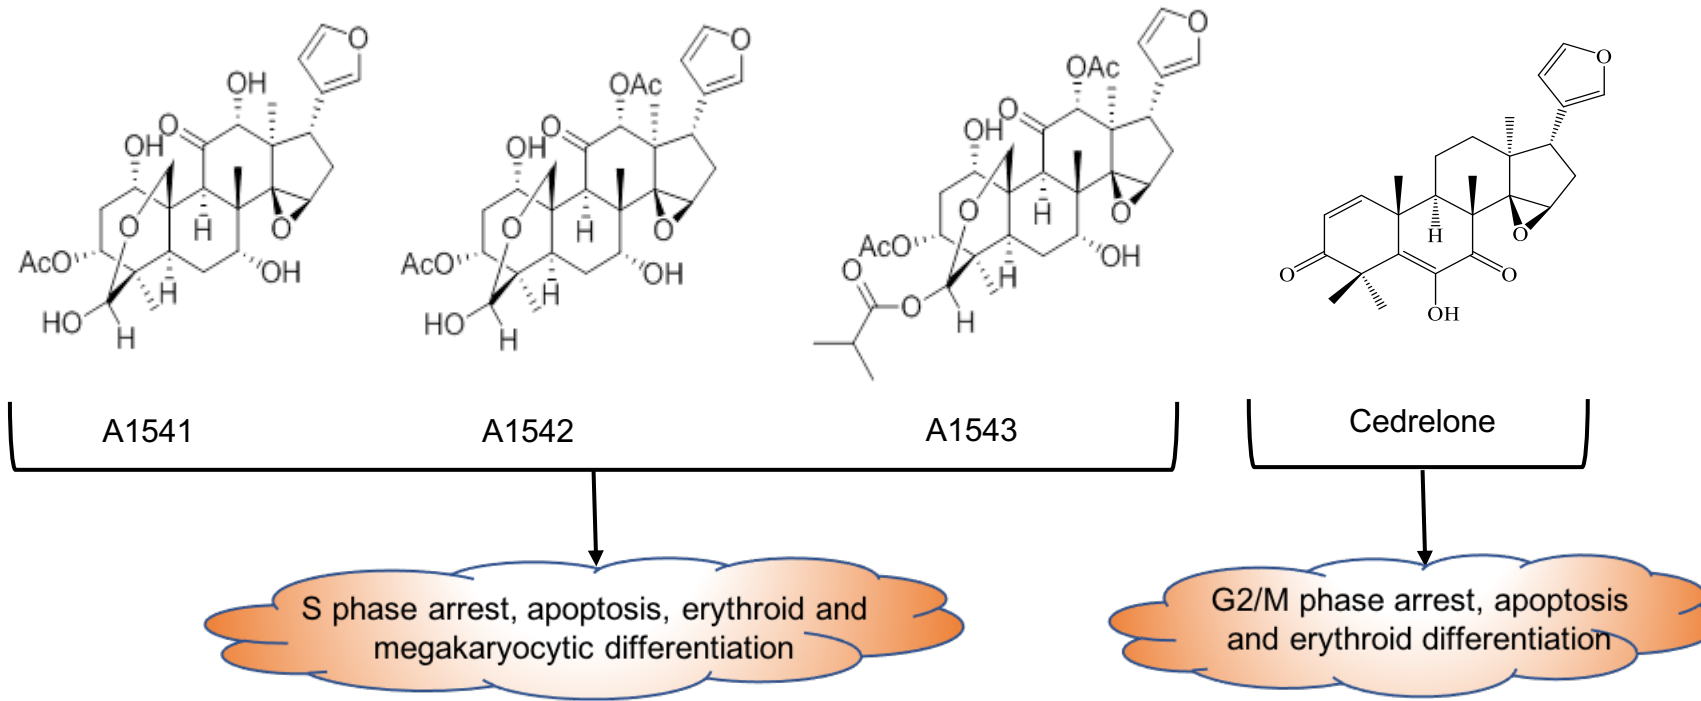

**Additional Figure 1:** Structure of A1541-A1543 and cedrelone compounds and their biological activity in culture.

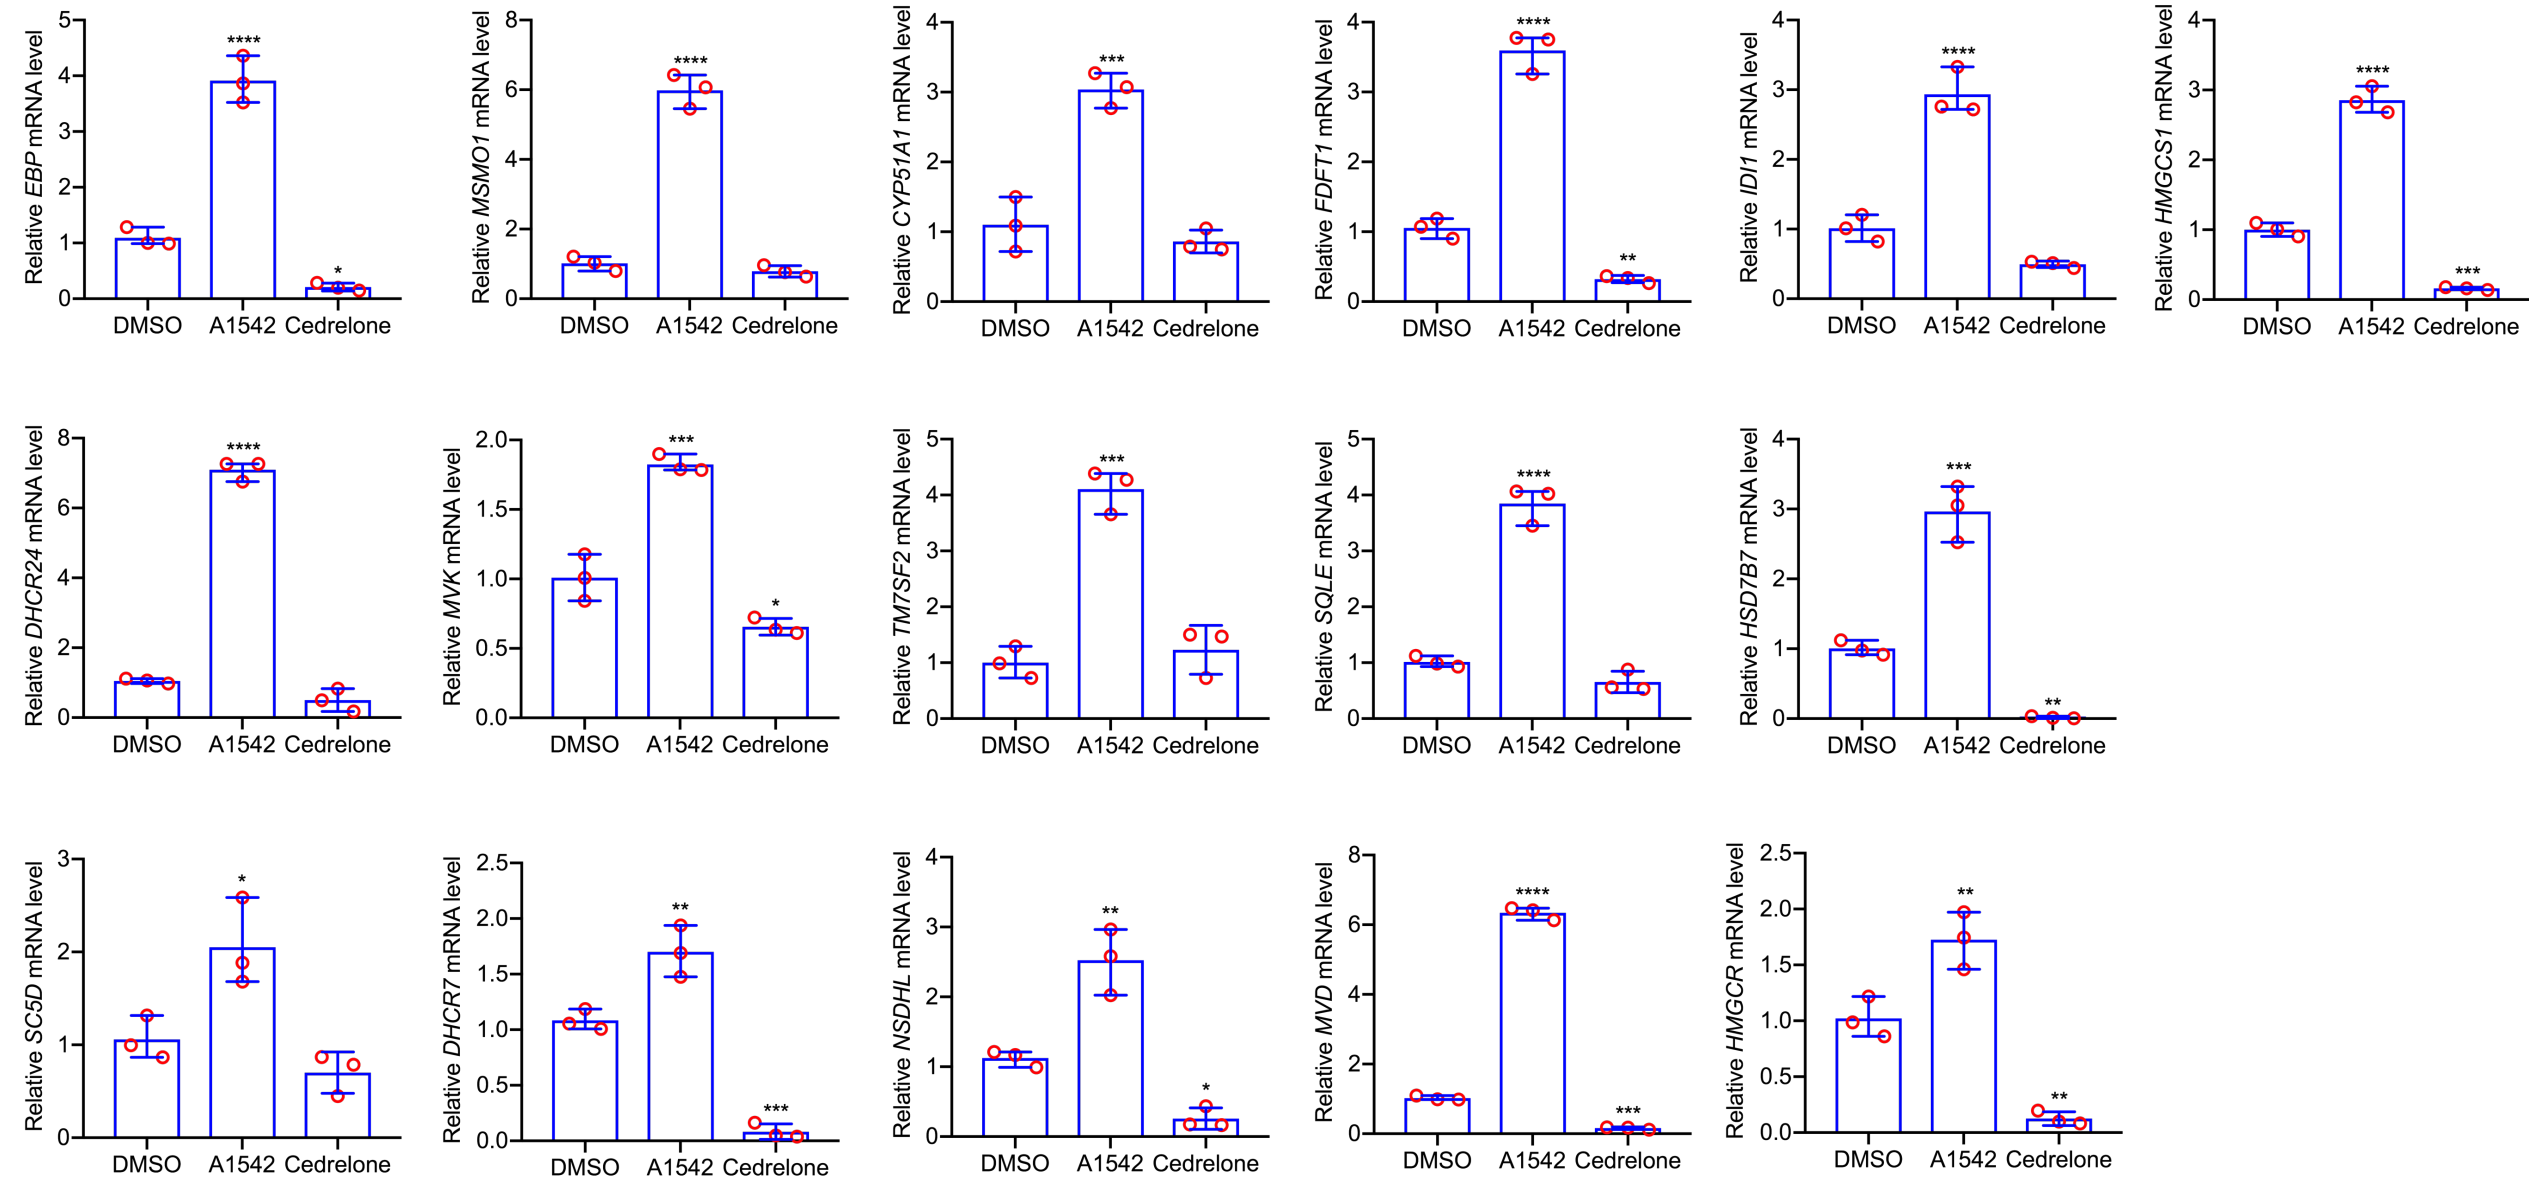

**Additional Figure 2:** Induction of the cholesterol biosynthesis genes by A1542. Q-RT-PCR analysis of expression of the indicated genes in HEL cells treated with DMSO or A1542 (1  $\mu$ M) for 24 h.

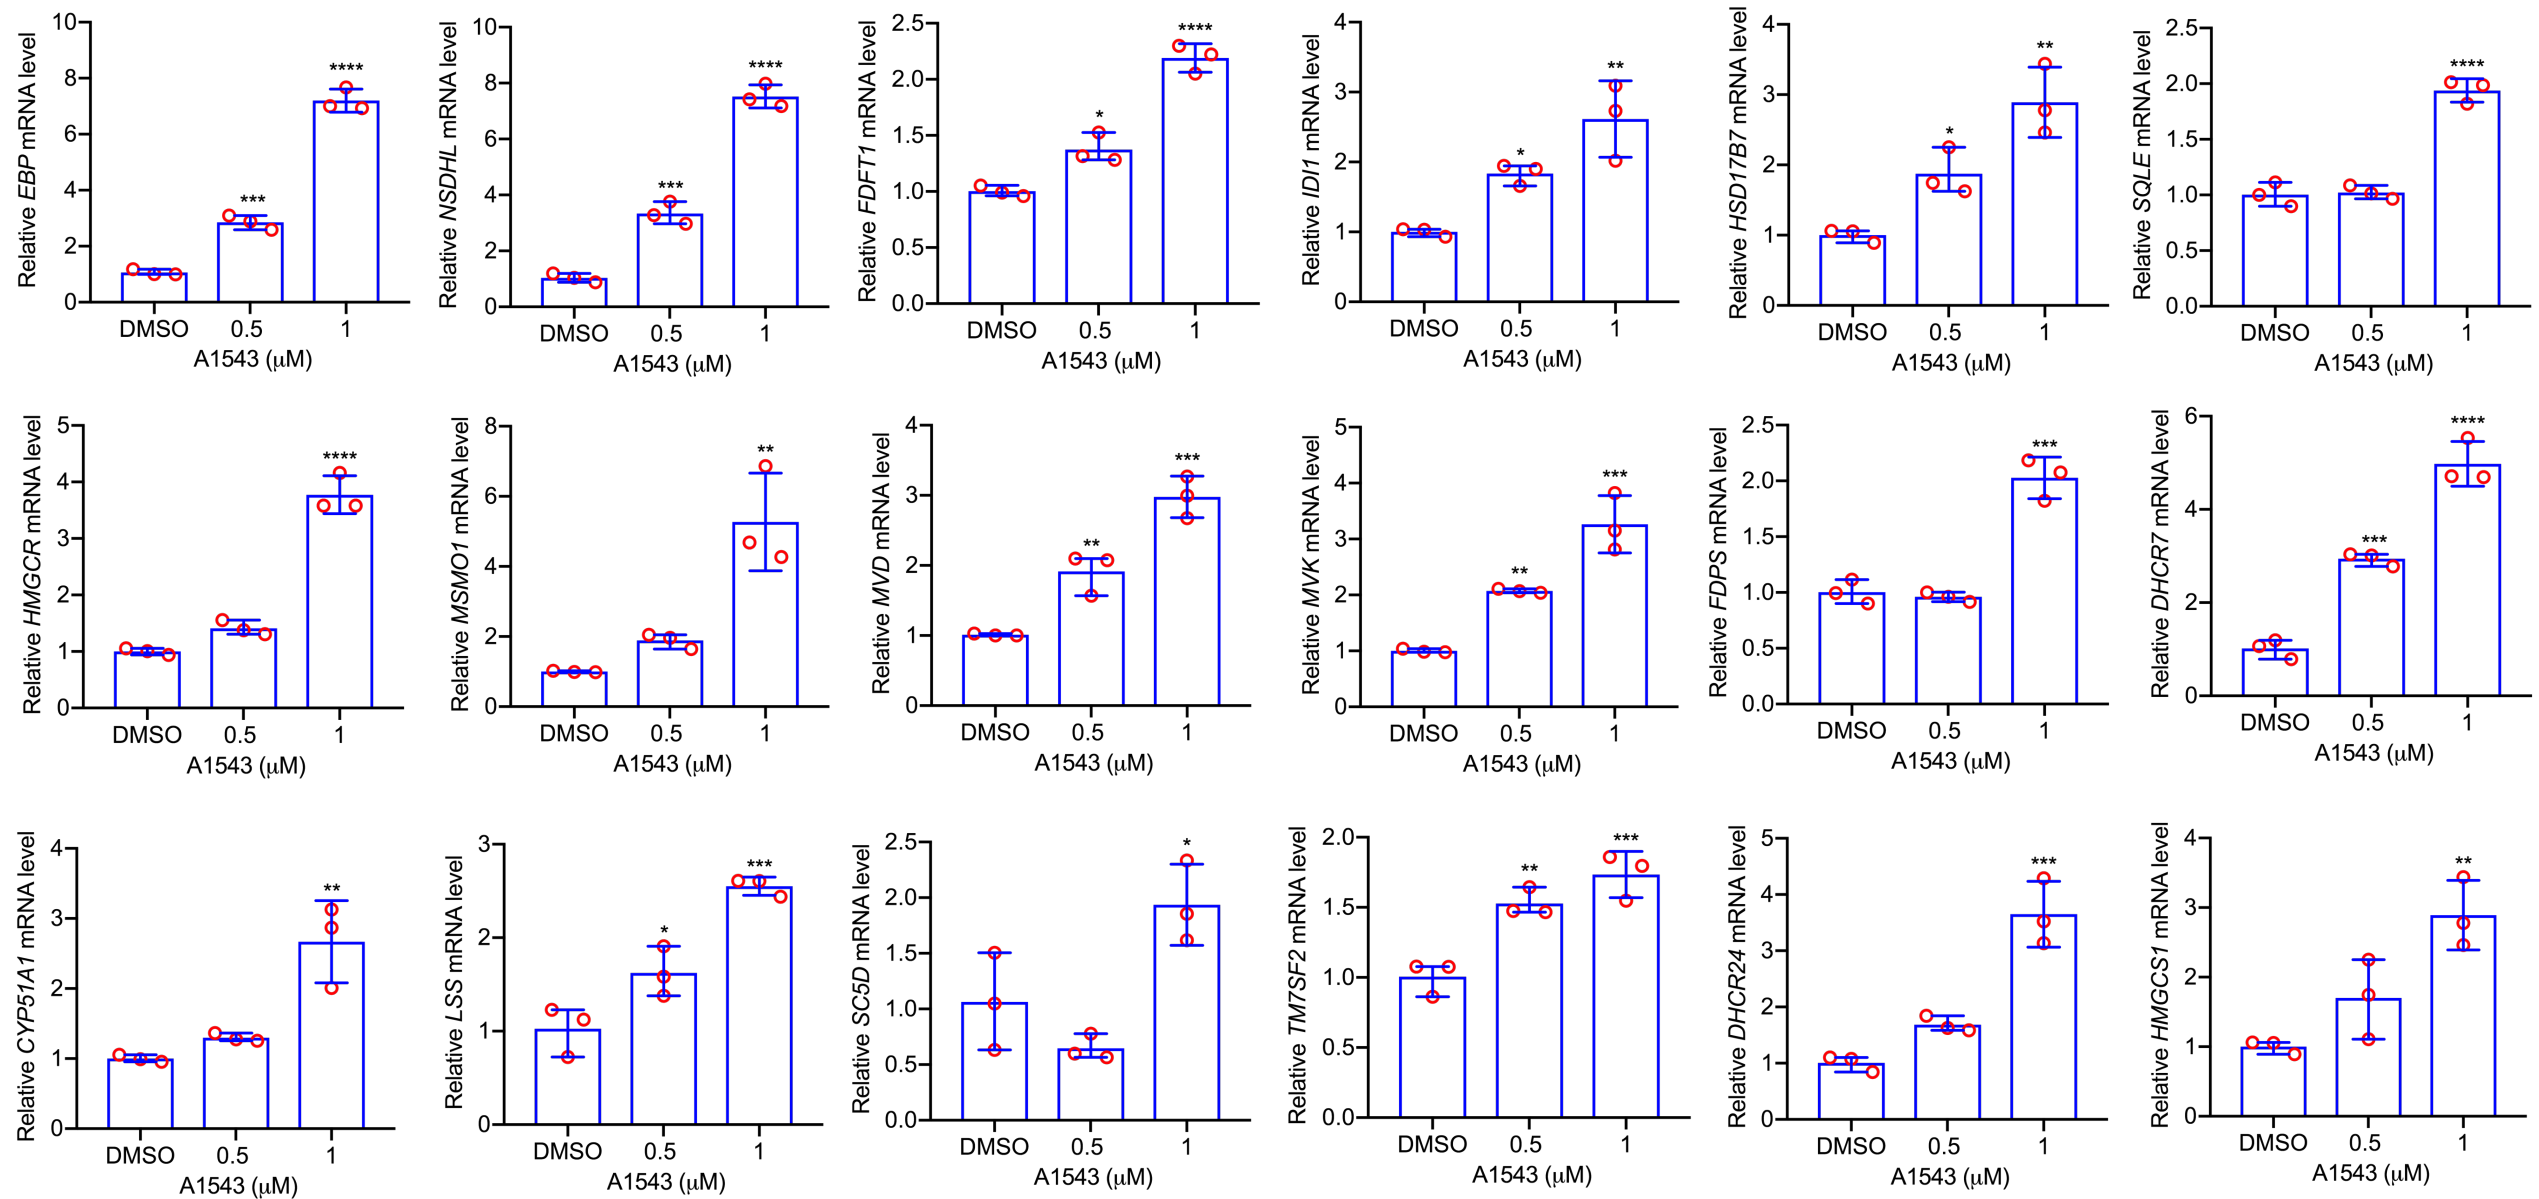

**Additional Figure 3:** Induction of the cholesterol biosynthesis genes by A1543. Q-RT-PCR analysis of expression of the indicated genes in HEL cells treated with DMSO or A1543 (1  $\mu\text{M}$ ) for 24 h.

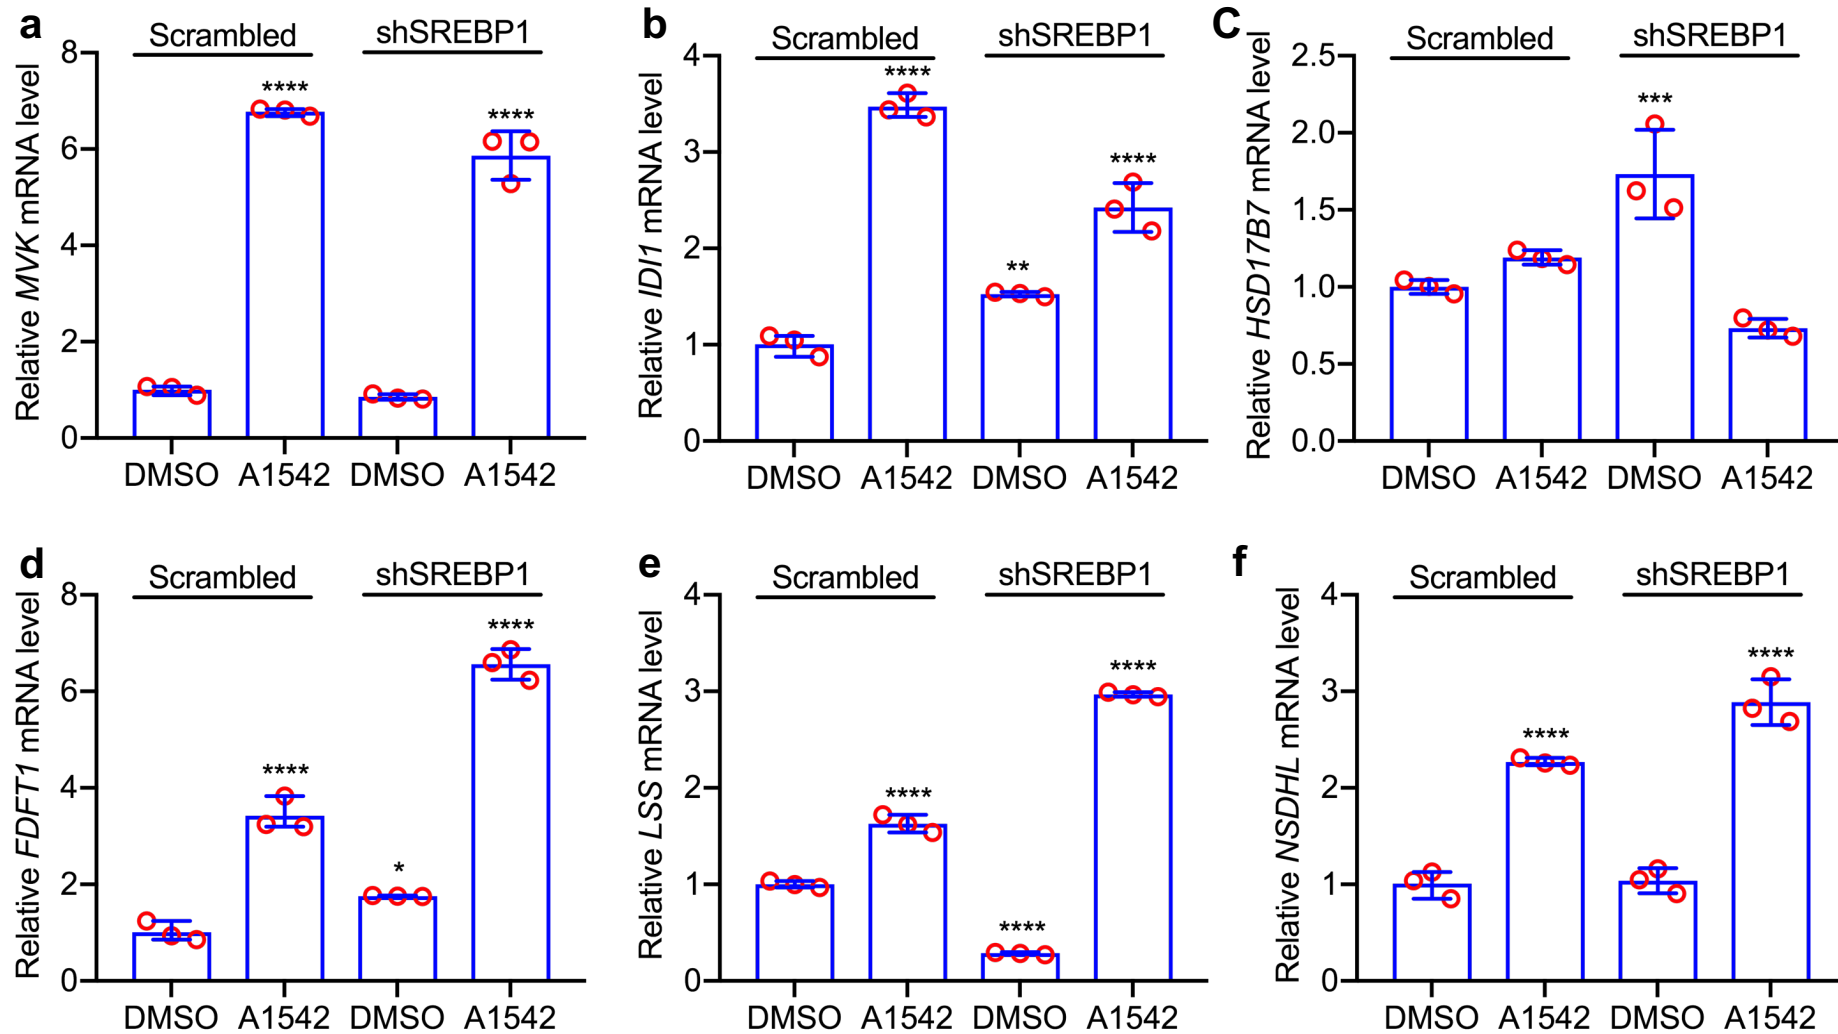

**Additional Figure 4:** Induction of the cholesterol biosynthesis genes by A1542 in SREBP1 knockdown cells. **a-f** Expression of the indicated genes in HEL cells treated with DMSO or A1542 (1  $\mu$ M) for 24 h by Q-RT-PCR.

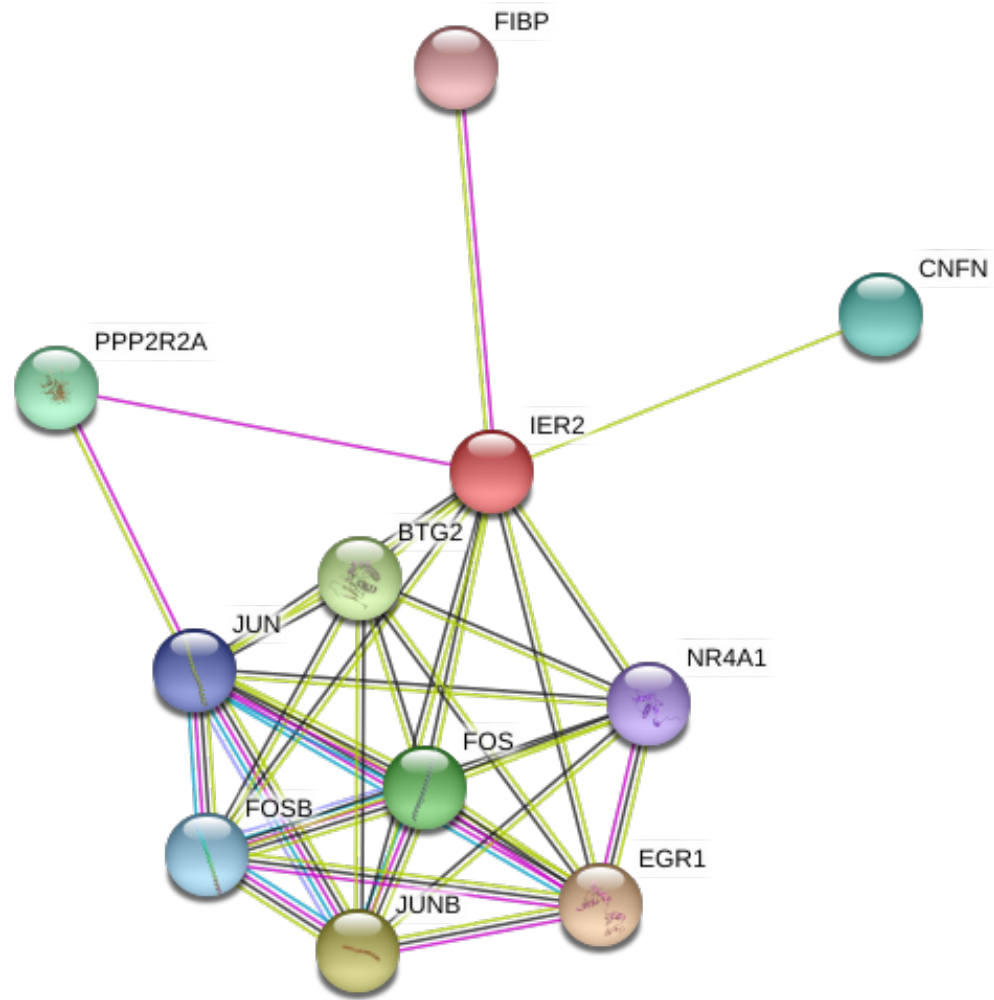

**Additional Figure 5.** Network map of genes interacts with EGR1 using STRING database.

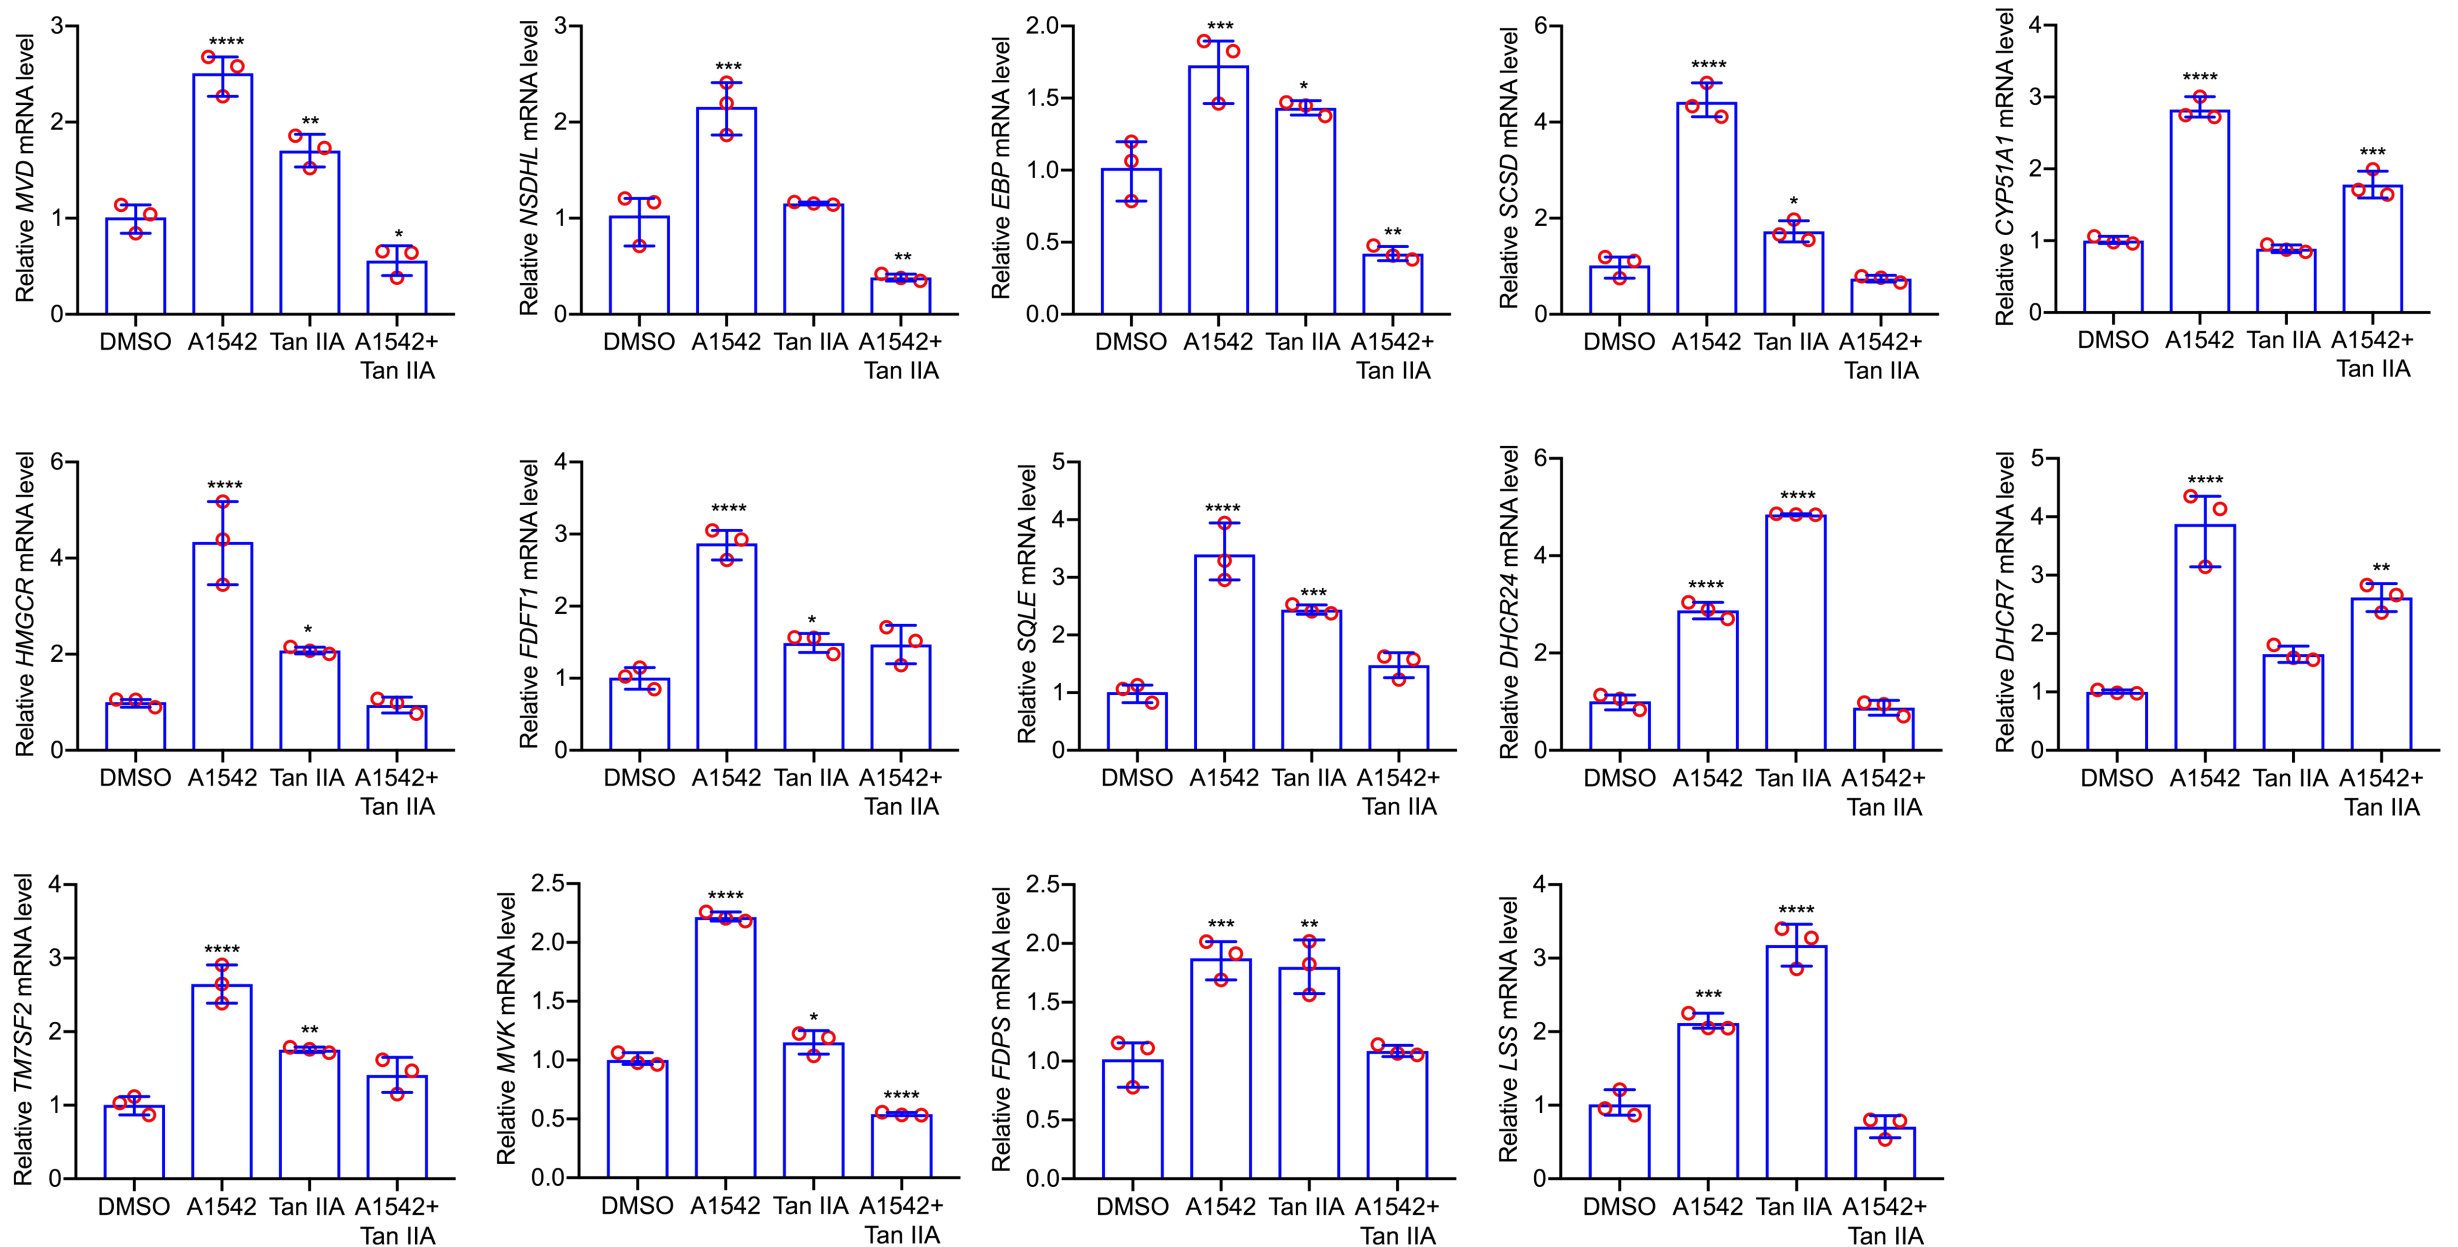

**Additional Figure 6:** Suppression of the cholesterol biosynthesis genes induced by A1542 by AP1 inhibitor Tanshinone. Q-RT-PCR analysis of expression of the indicated genes in HEL cells treated with DMSO, A1542 (1 μM), Tanshinone (Tan IIA, 10 μM) and A1542+Tan IIA for 24 h.
