# Supplementary material for: ERK activation via A1542/3 limonoids attenuates erythroleukemia through transcriptional stimulation of cholesterol biosynthesis genes
Source: PubMed Central journal article supplement (PMC8191108; doi:10.1186/s12885-021-08402-6), 2021-06-09

3. Data for uncropped western blots

Figure 2

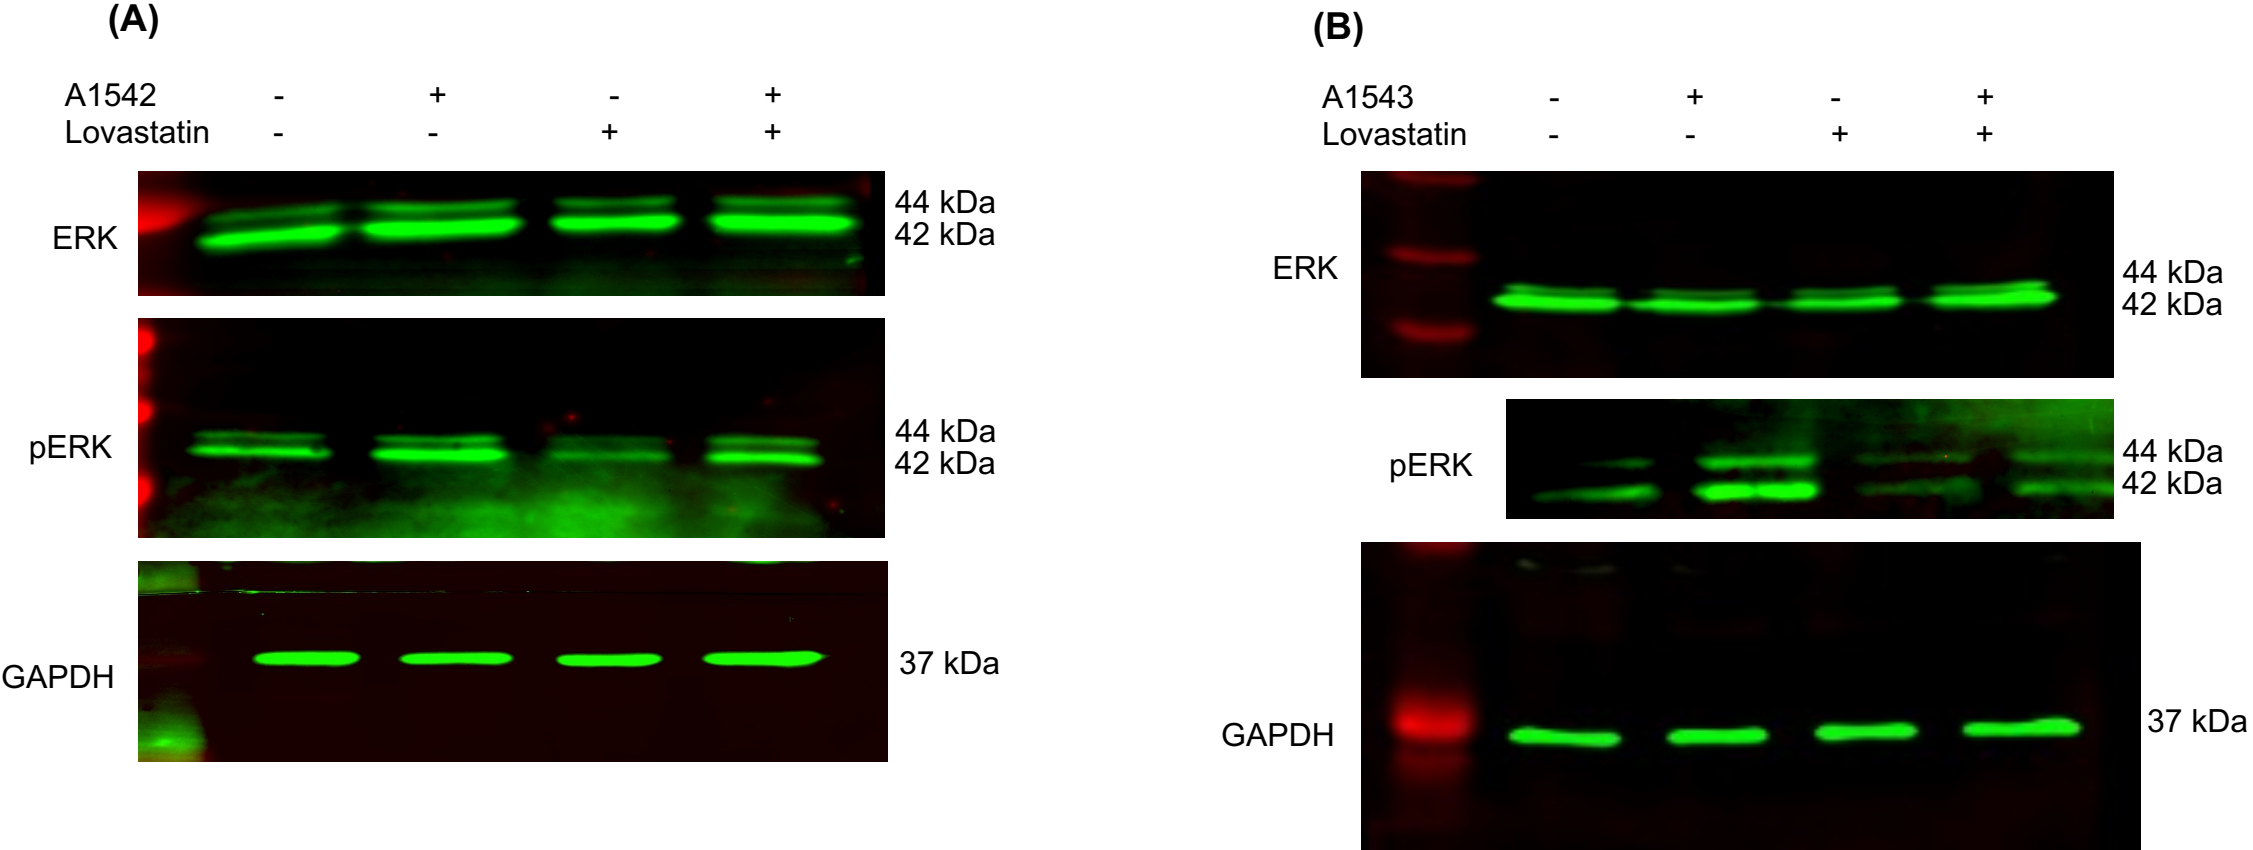

**Figure 4D**

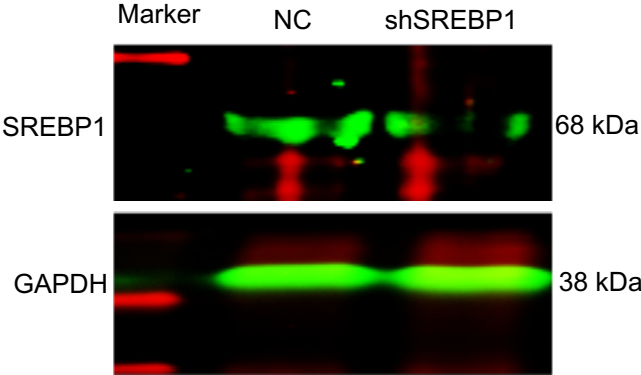

**Figure 5C**

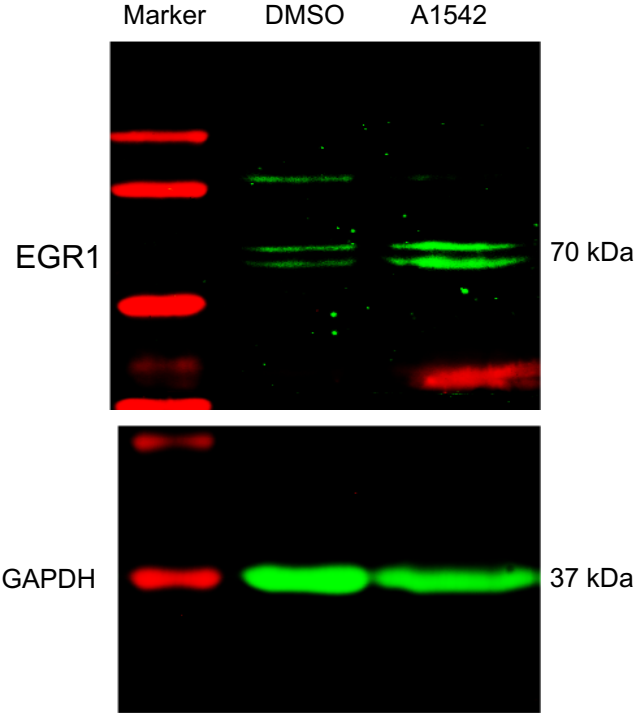

Supplement: 12885_2021_8402_MOESM3_ESM.pdf [file 12885_2021_8402_MOESM3_ESM.pdf]
